# Supplementary material
Source: Royal Society of Chemistry journal article supplement (doi:10.1039/d6tc01009a)
Supplement: d6tc01009a1.pdf [file d6tc01009a1.pdf]

## Supplementary information for

### **Tunable Negative and Low Thermal Expansion in Magnetic Calcite-Type $\text{Fe}_{1-x}\text{Cr}_x\text{BO}_3$ ( $x = 0.0, 0.14, 1.0$ ) Borates: A Comprehensive *In Situ* Study**

Yaroslav P. Biryukov, <sup>a</sup> Almaz L. Zinnatullin, <sup>b</sup> Andrey P. Shablinskii, <sup>a</sup> Yulia S. Gokhfeld, <sup>c</sup> Margarita S. Avdontceva, <sup>d</sup> Mikhail A. Cherosov, <sup>b</sup> Natalia V. Kazak, <sup>c</sup> Maria G. Krzhizhanovskaya, <sup>d</sup> Maxim D. Kuznetsov, <sup>a,b</sup> Valeriy L. Ugolkov, <sup>a</sup> Sergey M. Zharkov, <sup>c,e</sup> Galina M. Zeer, <sup>e</sup> Valery V. Rudenko, <sup>c</sup> Rimma S. Bubnova, <sup>a</sup> Farit G. Vagizov, <sup>b</sup> Stanislav K. Filatov, <sup>\*d</sup>

<sup>a</sup> *Institute of Silicate Chemistry, 199034 Saint Petersburg, Russian Federation*

<sup>b</sup> *Kazan Federal University, 420008 Kazan, Russian Federation*

<sup>c</sup> *Kirensky Institute of Physics, Federal Research Center KSC SB RAS, 660036 Krasnoyarsk, Russian Federation*

<sup>d</sup> *Institute of Earth Sciences, St. Petersburg State University, 199034 St. Petersburg, Russian Federation. E-mail address: Filatov.stanislav@gmail.com*

<sup>e</sup> *Siberian Federal University, 660041 Krasnoyarsk, Russian Federation*

#### **SI1. Scanning electron microscopy (FESEM) and energy dispersive spectroscopy (EDS)**

**Page S. 35**

#### **SI2. *In situ* high-temperature single-crystal X-ray diffraction**

**Page S. 36**

#### **SI3. *In situ* high-temperature powder X-ray diffraction**

**Page S. 44**

## S11. Scanning electron microscopy (FESEM) and energy dispersive spectroscopy (EDS)

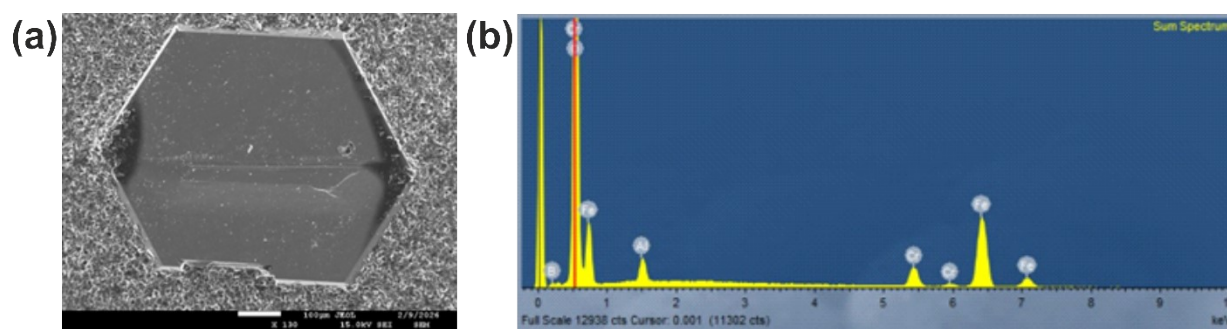

Fig. S1. The (a) SEM image and (b) EDS spectrum of  $\text{Fe}_{0.86}\text{Cr}_{0.14}\text{BO}_3$  single crystal.

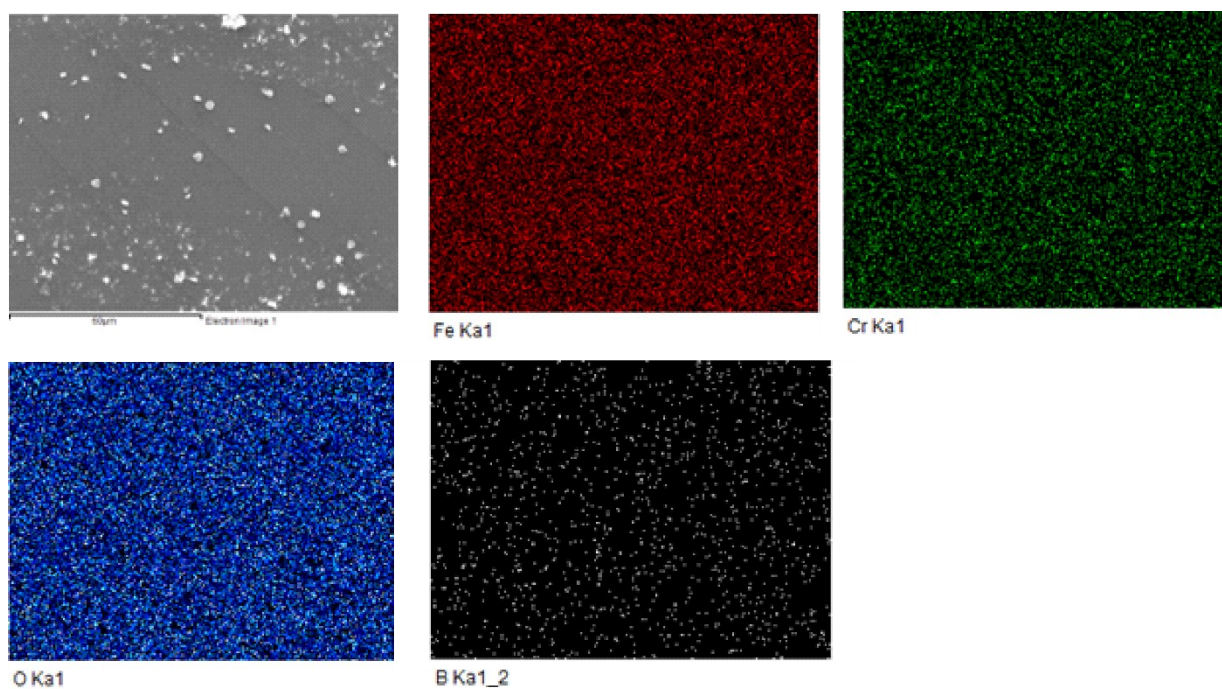

Fig. S2. The EDS elemental mapping in  $\text{Fe}_{0.86}\text{Cr}_{0.14}\text{BO}_3$  sample.

## SI2. *In situ* high-temperature single-crystal X-ray diffraction

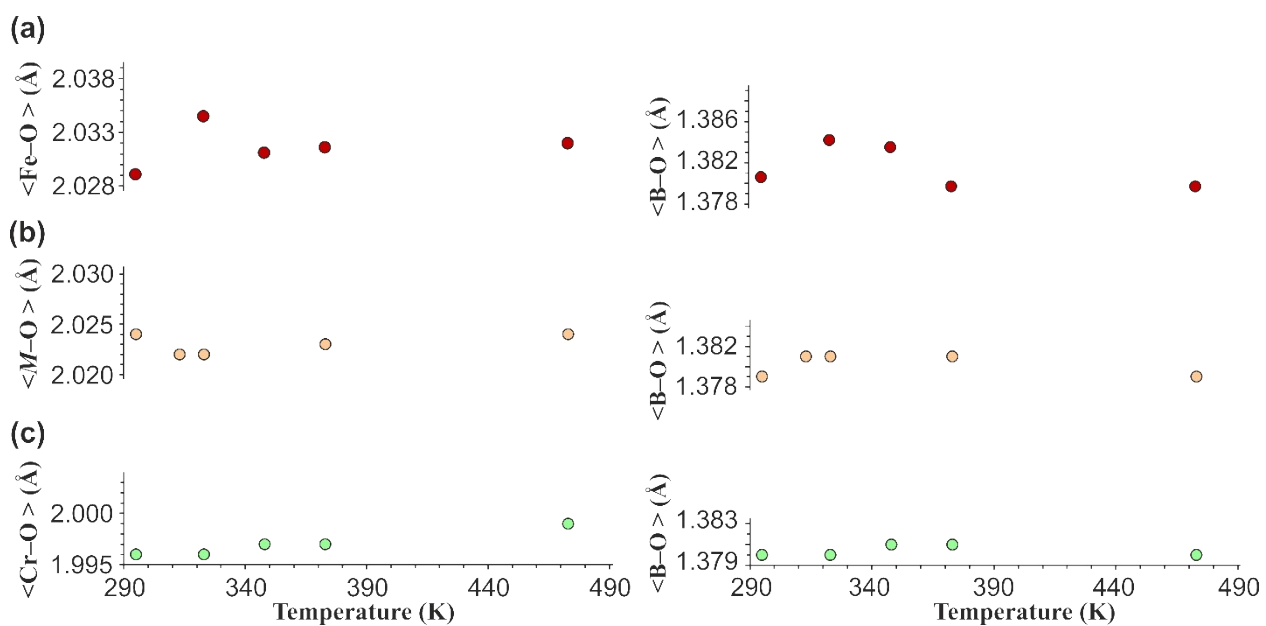

Fig. S3. Temperature dependencies of the  $\langle M-O \rangle$  and  $\langle B-O \rangle$  bond lengths in  $Fe_{1-x}Cr_xBO_3$ : (a)  $x = 0.0$ , (b) 0.14 and (c) 1.0.

Table S1. Fractional atomic coordinates and isotropic or equivalent isotropic displacement parameters ( $\text{\AA}^2$ ) for  $\text{FeBO}_3$ .

|       | <i>x</i>   | <i>y</i> | <i>z</i> | $U_{\text{iso}}^*/U_{\text{eq}}$ |
|-------|------------|----------|----------|----------------------------------|
| 295 K |            |          |          |                                  |
| Fe1   | 0.666667   | 0.333333 | 0.333333 | 0.0039 (3)                       |
| B1    | 0.333333   | 0.666667 | 0.416667 | 0.0053 (11)                      |
| O1    | 0.6315 (3) | 0.666667 | 0.416667 | 0.0049 (5)                       |
| 323 K |            |          |          |                                  |
| Fe1   | 0.666667   | 0.333333 | 0.333333 | 0.0042 (3)                       |
| B1    | 0.333333   | 0.666667 | 0.416667 | 0.0055 (11)                      |
| O1    | 0.6314 (3) | 0.666667 | 0.416667 | 0.0051 (5)                       |
| 348 K |            |          |          |                                  |
| Fe1   | 0.666667   | 0.333333 | 0.333333 | 0.0049 (2)                       |
| B1    | 0.333333   | 0.666667 | 0.416667 | 0.0056 (9)                       |
| O1    | 0.6317 (3) | 0.666667 | 0.416667 | 0.0058 (4)                       |
| 373 K |            |          |          |                                  |
| Fe1   | 0.666667   | 0.333333 | 0.333333 | 0.0048 (2)                       |
| B1    | 0.333333   | 0.666667 | 0.416667 | 0.0058 (10)                      |
| O1    | 0.6314 (3) | 0.666667 | 0.416667 | 0.0059 (4)                       |
| 473 K |            |          |          |                                  |
| Fe1   | 0.666667   | 0.333333 | 0.333333 | 0.0059 (2)                       |
| B1    | 0.333333   | 0.666667 | 0.416667 | 0.0068 (9)                       |
| O1    | 0.6311 (3) | 0.666667 | 0.416667 | 0.0071 (4)                       |

Table S2. Atomic displacement parameters ( $\text{\AA}^2$ ) for  $\text{FeBO}_3$ .

|       | $U^{11}$    | $U^{22}$    | $U^{33}$    | $U^{12}$     | $U^{13}$      | $U^{23}$    |
|-------|-------------|-------------|-------------|--------------|---------------|-------------|
| 295 K |             |             |             |              |               |             |
| Fe1   | 0.0041 (4)  | 0.0041 (4)  | 0.0035 (4)  | 0.00206 (18) | 0             | 0           |
| B1    | 0.0064 (14) | 0.0064 (14) | 0.003 (2)   | 0.0032 (7)   | 0             | 0           |
| O1    | 0.0048 (6)  | 0.0053 (7)  | 0.0048 (6)  | 0.0026 (4)   | -0.0005 (2)   | -0.0011 (4) |
| 323 K |             |             |             |              |               |             |
| Fe1   | 0.0048 (4)  | 0.0048 (4)  | 0.0031 (4)  | 0.00239 (18) | 0             | 0           |
| B1    | 0.0068 (14) | 0.0068 (14) | 0.003 (2)   | 0.0034 (7)   | 0             | 0           |
| O1    | 0.0052 (6)  | 0.0060 (7)  | 0.0044 (7)  | 0.0030 (4)   | -0.0006 (2)   | -0.0012 (5) |
| 348 K |             |             |             |              |               |             |
| Fe1   | 0.0057 (3)  | 0.0057 (3)  | 0.0032 (3)  | 0.00284 (14) | 0             | 0           |
| B1    | 0.0064 (10) | 0.0064 (10) | 0.0041 (15) | 0.0032 (5)   | 0             | 0           |
| O1    | 0.0058 (4)  | 0.0067 (5)  | 0.0053 (5)  | 0.0033 (3)   | -0.00077 (18) | -0.0015 (4) |
| 373 K |             |             |             |              |               |             |
| Fe1   | 0.0049 (3)  | 0.0049 (3)  | 0.0046 (3)  | 0.00246 (15) | 0             | 0           |
| B1    | 0.0063 (12) | 0.0063 (12) | 0.0050 (18) | 0.0031 (6)   | 0             | 0           |
| O1    | 0.0053 (5)  | 0.0062 (6)  | 0.0064 (6)  | 0.0031 (3)   | -0.0007 (2)   | -0.0013 (4) |
| 473 K |             |             |             |              |               |             |
| Fe1   | 0.0062 (3)  | 0.0062 (3)  | 0.0053 (3)  | 0.00310 (15) | 0             | 0           |
| B1    | 0.0076 (11) | 0.0076 (11) | 0.0052 (16) | 0.0038 (6)   | 0             | 0           |
| O1    | 0.0066 (5)  | 0.0074 (6)  | 0.0076 (6)  | 0.0037 (3)   | -0.0008 (2)   | -0.0017 (4) |

Table S3. Geometric parameters (Å, °) for FeBO<sub>3</sub>.

| Bond                 | Distance, Å | Bond                 | Distance, Å |
|----------------------|-------------|----------------------|-------------|
| 295 K                |             | 323 K                |             |
| Fe1—O1               | 2.0291 (7)  | Fe1—O1               | 2.0345 (7)  |
| Fe1—O1 <sup>i</sup>  | 2.0291 (7)  | Fe1—O1 <sup>i</sup>  | 2.0345 (7)  |
| Fe1—O1               | 2.0291 (13) | Fe1—O1               | 2.0345 (14) |
| Fe1—O1               | 2.0291 (7)  | Fe1—O1               | 2.0345 (7)  |
| Fe1—O1               | 2.0291 (7)  | Fe1—O1               | 2.0345 (7)  |
| Fe1—O1               | 2.0291 (13) | Fe1—O1               | 2.0345 (14) |
| <Fe1—O> <sub>6</sub> |             | <Fe1—O> <sub>6</sub> |             |
| B1—O1                | 1.3806 (15) | B1—O1                | 1.3842 (16) |
| B1—O1                | 1.3806 (15) | B1—O1                | 1.3842 (16) |
| B1—O1                | 1.3806 (11) | B1—O1                | 1.3842 (11) |
| <B1—O> <sub>3</sub>  |             | <B1—O> <sub>3</sub>  |             |
| 348 K                |             | 373 K                |             |
| Fe1—O1               | 2.0311 (5)  | Fe1—O1               | 2.0316 (6)  |
| Fe1—O1 <sup>i</sup>  | 2.0311 (5)  | Fe1—O1 <sup>i</sup>  | 2.0316 (6)  |
| Fe1—O1               | 2.0311 (10) | Fe1—O1               | 2.0316 (12) |
| Fe1—O1               | 2.0310 (5)  | Fe1—O1               | 2.0316 (6)  |
| Fe1—O1               | 2.0310 (5)  | Fe1—O1               | 2.0316 (6)  |
| Fe1—O1               | 2.0311 (10) | Fe1—O1               | 2.0316 (12) |
| <Fe1—O> <sub>6</sub> |             | <Fe1—O> <sub>6</sub> |             |
| B1—O1                | 1.3835 (12) | B1—O1                | 1.3797 (14) |
| B1—O1                | 1.3835 (12) | B1—O1                | 1.3797 (14) |
| B1—O1                | 1.3835 (8)  | B1—O1                | 1.3797 (10) |
| <B1—O> <sub>3</sub>  |             | <B1—O> <sub>3</sub>  |             |
| 473 K                |             |                      |             |
| Fe1—O1               | 2.0320 (6)  |                      |             |
| Fe1—O1 <sup>i</sup>  | 2.0320 (6)  |                      |             |
| Fe1—O1               | 2.0320 (12) |                      |             |
| Fe1—O1               | 2.0320 (6)  |                      |             |
| Fe1—O1               | 2.0320 (6)  |                      |             |
| Fe1—O1               | 2.0320 (12) |                      |             |
| <Fe1—O> <sub>6</sub> |             |                      |             |
| B1—O1                | 1.3797 (14) |                      |             |
| B1—O1                | 1.3797 (14) |                      |             |
| B1—O1                | 1.3797 (10) |                      |             |
| <B1—O> <sub>3</sub>  |             |                      |             |

Table S4. Fractional atomic coordinates and isotropic or equivalent isotropic displacement parameters ( $\text{\AA}^2$ ) for  $\text{Fe}_{0.86}\text{Cr}_{0.14}\text{BO}_3$ .

| 295 K |            |          |          |                                  |           |
|-------|------------|----------|----------|----------------------------------|-----------|
|       | <i>x</i>   | <i>y</i> | <i>z</i> | $U_{\text{iso}}^*/U_{\text{eq}}$ | Occ. (<1) |
| Fe1   | 1          | 1        | 0.5      | 0.0159 (3)                       | 0.86      |
| Cr1   | 1          | 1        | 0.5      | 0.0159 (3)                       | 0.14      |
| B1    | 0.666667   | 0.333333 | 0.583333 | 0.0172 (13)                      |           |
| O1    | 0.9652 (4) | 0.333333 | 0.583333 | 0.0169 (6)                       |           |
| 313 K |            |          |          |                                  |           |
| Fe1   | 0          | 0        | 0.5      | 0.0041 (2)                       | 0.86      |
| Cr1   | 0          | 0        | 0.5      | 0.0041 (2)                       | 0.14      |
| B1    | 0.666667   | 0.333333 | 0.583333 | 0.0044 (9)                       |           |
| O1    | 0.3677 (3) | 0.333333 | 0.583333 | 0.0052 (4)                       |           |
| 323 K |            |          |          |                                  |           |
| Fe1   | 0          | 0        | 0.5      | 0.0041 (2)                       | 0.86      |
| Cr1   | 0          | 0        | 0.5      | 0.0041 (2)                       | 0.14      |
| B1    | 0.666667   | 0.333333 | 0.583333 | 0.0045 (9)                       |           |
| O1    | 0.3677 (3) | 0.333333 | 0.583333 | 0.0052 (4)                       |           |
| 373 K |            |          |          |                                  |           |
| Fe1   | 0          | 0        | 0.5      | 0.0047 (2)                       | 0.86      |
| Cr1   | 0          | 0        | 0.5      | 0.0047 (2)                       | 0.14      |
| B1    | 0.666667   | 0.333333 | 0.583333 | 0.0052 (9)                       |           |
| O1    | 0.3677 (3) | 0.333333 | 0.583333 | 0.0057 (4)                       |           |
| 473 K |            |          |          |                                  |           |
| Fe1   | 0          | 0        | 0.5      | 0.0057 (2)                       | 0.86      |
| Cr1   | 0          | 0        | 0.5      | 0.0057 (2)                       | 0.14      |
| B1    | 0.666667   | 0.333333 | 0.583333 | 0.0056 (9)                       |           |
| O1    | 0.3681 (3) | 0.333333 | 0.583333 | 0.0069 (4)                       |           |

Table S5. Atomic displacement parameters ( $\text{\AA}^2$ ) for  $\text{Fe}_{0.86}\text{Cr}_{0.14}\text{BO}_3$ .

| 295 K |             |             |             |              |             |             |
|-------|-------------|-------------|-------------|--------------|-------------|-------------|
|       | $U^{11}$    | $U^{22}$    | $U^{33}$    | $U^{12}$     | $U^{13}$    | $U^{23}$    |
| Fe1   | 0.0158 (3)  | 0.0158 (3)  | 0.0161 (4)  | 0.00792 (17) | 0           | 0           |
| Cr1   | 0.0158 (3)  | 0.0158 (3)  | 0.0161 (4)  | 0.00792 (17) | 0           | 0           |
| B1    | 0.0171 (16) | 0.0171 (16) | 0.017 (2)   | 0.0086 (8)   | 0           | 0           |
| O1    | 0.0163 (6)  | 0.0163 (6)  | 0.0178(8)   | 0.0078 (7)   | -0.0006 (3) | 0.0006 (3)  |
| 313 K |             |             |             |              |             |             |
| Fe1   | 0.0041 (3)  | 0.0041 (3)  | 0.0039 (3)  | 0.00207 (14) | 0           | 0           |
| Cr1   | 0.0041 (3)  | 0.0041 (3)  | 0.0039 (3)  | 0.00207 (14) | 0           | 0           |
| B1    | 0.0046 (11) | 0.0046 (11) | 0.0041 (16) | 0.0023 (5)   | 0           | 0           |
| O1    | 0.0044 (5)  | 0.0059 (6)  | 0.0057 (6)  | 0.0030 (3)   | -0.0008 (2) | -0.0015 (4) |
| 323 K |             |             |             |              |             |             |
| Fe1   | 0.0040 (3)  | 0.0040 (3)  | 0.0043 (3)  | 0.00201 (13) | 0           | 0           |
| Cr1   | 0.0040 (3)  | 0.0040 (3)  | 0.0043 (3)  | 0.00201 (13) | 0           | 0           |
| B1    | 0.0041 (11) | 0.0041 (11) | 0.0054 (16) | 0.0021 (5)   | 0           | 0           |
| O1    | 0.0044 (5)  | 0.0050 (6)  | 0.0062 (6)  | 0.0025 (3)   | -0.0006 (2) | -0.0012 (4) |
| 373 K |             |             |             |              |             |             |
| Fe1   | 0.0040 (3)  | 0.0040 (3)  | 0.0059 (3)  | 0.00202 (13) | 0           | 0           |
| Cr1   | 0.0040 (3)  | 0.0040 (3)  | 0.0059 (3)  | 0.00202 (13) | 0           | 0           |
| B1    | 0.0049 (10) | 0.0049 (10) | 0.0058 (16) | 0.0024 (5)   | 0           | 0           |
| O1    | 0.0042 (5)  | 0.0054 (6)  | 0.0079 (6)  | 0.0027 (3)   | -0.0006 (2) | -0.0013 (4) |
| 473 K |             |             |             |              |             |             |
| Fe1   | 0.0052 (3)  | 0.0052 (3)  | 0.0066 (3)  | 0.00259 (13) | 0           | 0           |
| Cr1   | 0.0052 (3)  | 0.0052 (3)  | 0.0066 (3)  | 0.00259 (13) | 0           | 0           |
| B1    | 0.0054 (10) | 0.0054 (10) | 0.0058 (16) | 0.0027 (5)   | 0           | 0           |
| O1    | 0.0054 (5)  | 0.0066 (6)  | 0.0090 (6)  | 0.0033 (3)   | -0.0008 (2) | -0.0016 (4) |

Table S6. Geometric parameters (Å, °) for Fe<sub>0.86</sub>Cr<sub>0.14</sub>BO<sub>3</sub>.

| Bond                | Distance, Å | Bond                | Distance, Å |
|---------------------|-------------|---------------------|-------------|
| 295 K               |             | 313 K               |             |
| M1—O1               | 2.0237 (9)  | M1—O1               | 2.0220 (7)  |
| M1—O1               | 2.0237 (9)  | M1—O1               | 2.0220 (7)  |
| M1—O1               | 2.0237 (9)  | M1—O1               | 2.0220 (13) |
| M1—O1               | 2.0237 (9)  | M1—O1               | 2.0220 (7)  |
| M1—O1               | 2.0237 (9)  | M1—O1               | 2.0220 (7)  |
| M1—O1               | 2.0237 (9)  | M1—O1               | 2.0220 (13) |
| <M1—O> <sub>6</sub> | 2.024       | <M1—O> <sub>6</sub> | 2.022       |
| B1—O1               | 1.379 (2)   | B1—O1               | 1.3805 (14) |
| B1—O1               | 1.379 (2)   | B1—O1               | 1.3805 (14) |
| B1—O1               | 1.379 (2)   | B1—O1               | 1.3806 (10) |
| <B1—O> <sub>3</sub> | 1.379       | <B1—O> <sub>3</sub> | 1.381       |
| 323 K               |             | 373 K               |             |
| M1—O1               | 2.0224 (7)  | M1—O1               | 2.0230 (7)  |
| M1—O1               | 2.0224 (7)  | M1—O1               | 2.0230 (7)  |
| M1—O1               | 2.0224 (12) | M1—O1               | 2.0230 (12) |
| M1—O1               | 2.0224 (7)  | M1—O1               | 2.0230 (7)  |
| M1—O1               | 2.0224 (7)  | M1—O1               | 2.0230 (7)  |
| M1—O1               | 2.0224 (12) | M1—O1               | 2.0230 (12) |
| <M1—O> <sub>6</sub> | 2.022       | <M1—O> <sub>6</sub> | 2.023       |
| B1—O1               | 1.3807 (14) | B1—O1               | 1.3811 (14) |
| B1—O1               | 1.3807 (14) | B1—O1               | 1.3812 (14) |
| B1—O1               | 1.3807 (10) | B1—O1               | 1.3812 (10) |
| <B1—O> <sub>3</sub> | 1.381       | <B1—O> <sub>3</sub> | 1.381       |
| 473 K               |             |                     |             |
| M1—O1               | 2.0242 (8)  |                     |             |
| M1—O1               | 2.0242 (9)  |                     |             |
| M1—O1               | 2.0242 (13) |                     |             |
| M1—O1               | 2.0242 (8)  |                     |             |
| M1—O1               | 2.0242 (9)  |                     |             |
| M1—O1               | 2.0242 (13) |                     |             |
| <M1—O> <sub>6</sub> | 2.024       |                     |             |
| B1—O1               | 1.3787 (15) |                     |             |
| B1—O1               | 1.3787 (15) |                     |             |
| B1—O1               | 1.3787 (12) |                     |             |
| <B1—O> <sub>3</sub> | 1.379       |                     |             |

Table S7. Fractional atomic coordinates and isotropic or equivalent isotropic displacement parameters ( $\text{\AA}^2$ ) for  $\text{CrBO}_3$ .

|       | <i>x</i>   | <i>y</i> | <i>z</i> | $U_{\text{iso}}^*/U_{\text{eq}}$ |
|-------|------------|----------|----------|----------------------------------|
| 295 K |            |          |          |                                  |
| Cr1   | 0.666667   | 0.333333 | 0.333333 | 0.0038 (2)                       |
| B1    | 0.333333   | 0.666667 | 0.416667 | 0.0051 (9)                       |
| O1    | 0.6347 (3) | 0.666667 | 0.416667 | 0.0057 (4)                       |
| 323 K |            |          |          |                                  |
| Cr1   | 0.666667   | 0.333333 | 0.333333 | 0.0034 (2)                       |
| B1    | 0.333333   | 0.666667 | 0.416667 | 0.0052 (10)                      |
| O1    | 0.6349 (3) | 0.666667 | 0.416667 | 0.0053 (4)                       |
| 348 K |            |          |          |                                  |
| Cr1   | 0.666667   | 0.333333 | 0.333333 | 0.0041 (2)                       |
| B1    | 0.333333   | 0.666667 | 0.416667 | 0.0055 (8)                       |
| O1    | 0.6348 (3) | 0.666667 | 0.416667 | 0.0061 (4)                       |
| 373 K |            |          |          |                                  |
| Cr1   | 0.666667   | 0.333333 | 0.333333 | 0.0039 (2)                       |
| B1    | 0.333333   | 0.666667 | 0.416667 | 0.0050 (9)                       |
| O1    | 0.6349 (3) | 0.666667 | 0.416667 | 0.0060 (4)                       |
| 473 K |            |          |          |                                  |
| Cr1   | 0.666667   | 0.333333 | 0.333333 | 0.00467 (19)                     |
| B1    | 0.333333   | 0.666667 | 0.416667 | 0.0063 (8)                       |
| O1    | 0.6346 (3) | 0.666667 | 0.416667 | 0.0069 (4)                       |

Table S8. Atomic displacement parameters ( $\text{\AA}^2$ ) for  $\text{CrBO}_3$ .

|       | $U^{11}$    | $U^{22}$    | $U^{33}$    | $U^{12}$     | $U^{13}$    | $U^{23}$    |
|-------|-------------|-------------|-------------|--------------|-------------|-------------|
| 295 K |             |             |             |              |             |             |
| Cr1   | 0.0036 (3)  | 0.0036 (3)  | 0.0042 (3)  | 0.00182 (14) | 0           | 0           |
| B1    | 0.0049 (10) | 0.0049 (10) | 0.0055 (15) | 0.0024 (5)   | 0           | 0           |
| O1    | 0.0050 (5)  | 0.0058 (6)  | 0.0065 (6)  | 0.0029 (3)   | -0.0006 (2) | -0.0013 (4) |
| 323 K |             |             |             |              |             |             |
| Cr1   | 0.0033 (3)  | 0.0033 (3)  | 0.0035 (3)  | 0.00167 (13) | 0           | 0           |
| B1    | 0.0057 (12) | 0.0057 (12) | 0.0043 (17) | 0.0028 (6)   | 0           | 0           |
| O1    | 0.0049 (5)  | 0.0056 (7)  | 0.0056 (6)  | 0.0028 (3)   | -0.0006 (2) | -0.0012 (5) |
| 348 K |             |             |             |              |             |             |
| Cr1   | 0.0040 (3)  | 0.0040 (3)  | 0.0043 (3)  | 0.00199 (13) | 0           | 0           |
| B1    | 0.0059 (10) | 0.0059 (10) | 0.0046 (15) | 0.0030 (5)   | 0           | 0           |
| O1    | 0.0058 (5)  | 0.0063 (6)  | 0.0065 (6)  | 0.0032 (3)   | -0.0008 (2) | -0.0016 (4) |
| 373 K |             |             |             |              |             |             |
| Cr1   | 0.0030 (3)  | 0.0030 (3)  | 0.0057 (3)  | 0.00151 (14) | 0           | 0           |
| B1    | 0.0046 (11) | 0.0046 (11) | 0.0060 (16) | 0.0023 (5)   | 0           | 0           |
| O1    | 0.0049 (5)  | 0.0055 (6)  | 0.0079 (6)  | 0.0027 (3)   | -0.0007 (2) | -0.0014 (5) |
| 473 K |             |             |             |              |             |             |
| Cr1   | 0.0041 (2)  | 0.0041 (2)  | 0.0059 (3)  | 0.00203 (12) | 0           | 0           |
| B1    | 0.0061 (9)  | 0.0061 (9)  | 0.0068 (14) | 0.0031 (5)   | 0           | 0           |
| O1    | 0.0058 (4)  | 0.0064 (5)  | 0.0088 (6)  | 0.0032 (3)   | -0.0009 (2) | -0.0017 (4) |

Table S9. Geometric parameters (Å, °) for CrBO<sub>3</sub>.

| Bond                 | Distance, Å | Bond                 | Distance, Å |
|----------------------|-------------|----------------------|-------------|
| 295 K                |             | 323 K                |             |
| Cr1—O1               | 1.9964 (6)  | Cr1—O1               | 1.9961 (7)  |
| Cr1—O1               | 1.9964 (6)  | Cr1—O1               | 1.9961 (7)  |
| Cr1—O1               | 1.9964 (12) | Cr1—O1               | 1.9961 (13) |
| Cr1—O1               | 1.9964 (6)  | Cr1—O1               | 1.9961 (7)  |
| Cr1—O1               | 1.9964 (6)  | Cr1—O1               | 1.9961 (7)  |
| Cr1—O1               | 1.9964 (12) | Cr1—O1               | 1.9961 (13) |
| <Cr1—O> <sub>6</sub> | 1.996       | <Cr1—O> <sub>6</sub> | 1.996       |
| B1—O1                | 1.3800 (13) | B1—O1                | 1.3804 (15) |
| B1—O1                | 1.3800 (13) | B1—O1                | 1.3804 (15) |
| B1—O1                | 1.3800 (9)  | B1—O1                | 1.3804 (11) |
| <B1—O> <sub>3</sub>  | 1.380       | <B1—O> <sub>3</sub>  | 1.380       |
| 348 K                |             | 373 K                |             |
| Cr1—O1               | 1.9973 (6)  | Cr1—O1               | 1.9970 (7)  |
| Cr1—O1               | 1.9973 (6)  | Cr1—O1               | 1.9970 (7)  |
| Cr1—O1               | 1.9973 (12) | Cr1—O1               | 1.9970 (13) |
| Cr1—O1               | 1.9973 (6)  | Cr1—O1               | 1.9970 (7)  |
| Cr1—O1               | 1.9973 (6)  | Cr1—O1               | 1.9970 (7)  |
| Cr1—O1               | 1.9973 (12) | Cr1—O1               | 1.9970 (13) |
| <Cr1—O> <sub>6</sub> | 1.997       | <Cr1—O> <sub>6</sub> | 1.997       |
| B1—O1                | 1.3807 (14) | B1—O1                | 1.3806 (15) |
| B1—O1                | 1.3807 (14) | B1—O1                | 1.3806 (15) |
| B1—O1                | 1.3807 (10) | B1—O1                | 1.3806 (10) |
| <B1—O> <sub>3</sub>  | 1.381       | <B1—O> <sub>3</sub>  | 1.381       |
| 473 K                |             |                      |             |
| Cr1—O1               | 1.9987 (6)  |                      |             |
| Cr1—O1               | 1.9987 (6)  |                      |             |
| Cr1—O1               | 1.9987 (11) |                      |             |
| Cr1—O1               | 1.9987 (6)  |                      |             |
| Cr1—O1               | 1.9987 (6)  |                      |             |
| Cr1—O1               | 1.9987 (11) |                      |             |
| <Cr1—O> <sub>6</sub> | 1.999       |                      |             |
| B1—O1                | 1.3800 (12) |                      |             |
| B1—O1                | 1.3800 (12) |                      |             |
| B1—O1                | 1.3800 (9)  |                      |             |
| <B1—O> <sub>3</sub>  | 1.380       |                      |             |

### SI3. *In situ* high-temperature powder X-ray diffraction

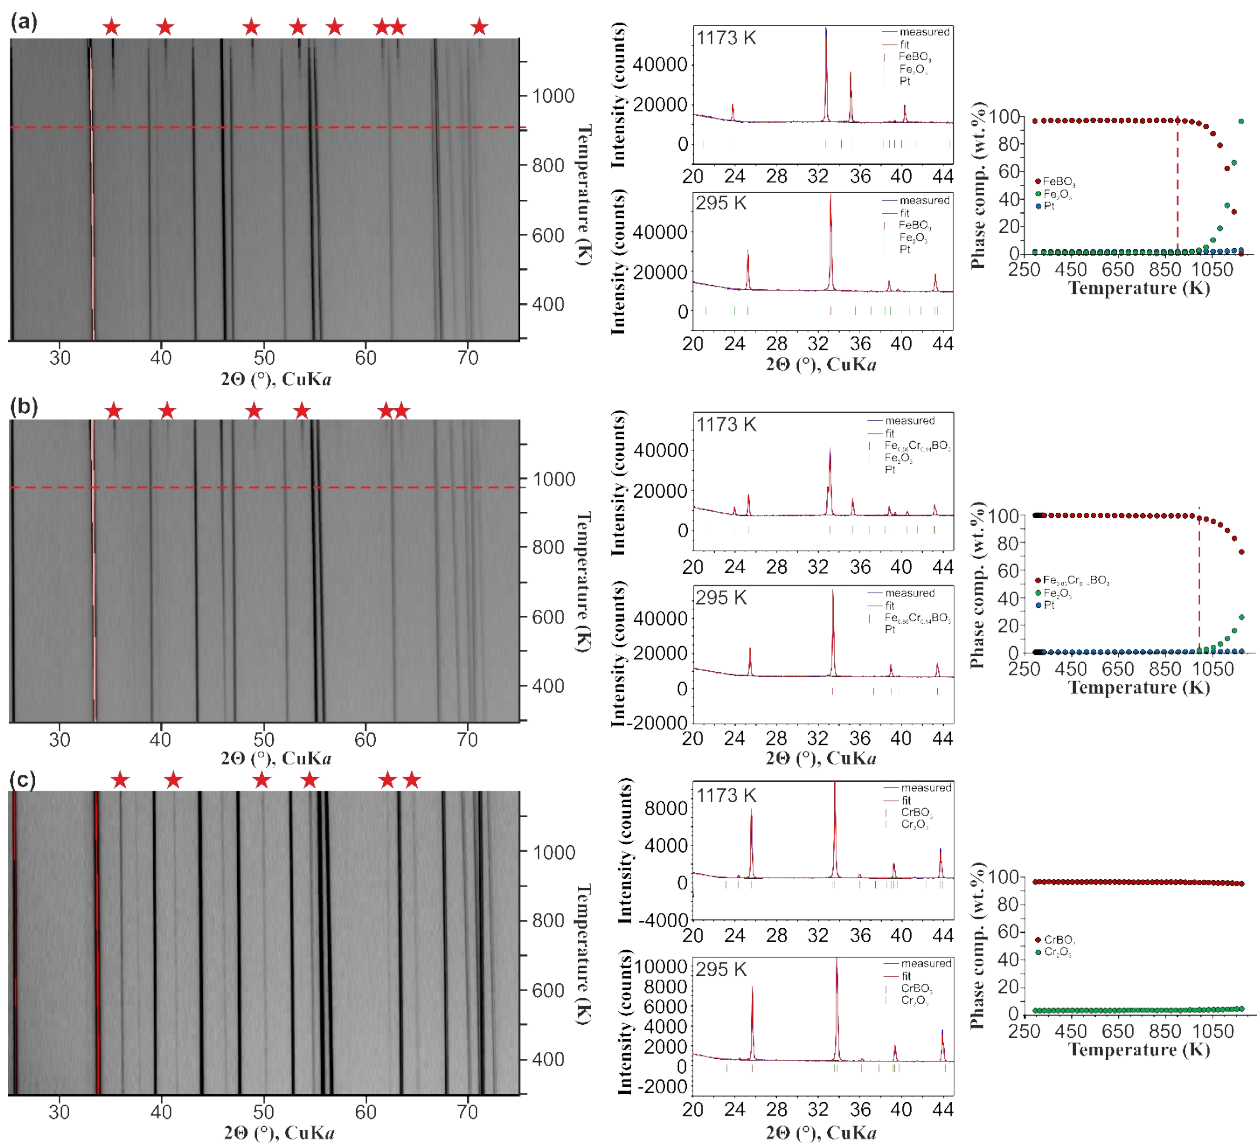

Fig. S4 2D-images of X-ray diffraction patterns (CuK $\alpha_{1+2}$ ) of  $\text{Fe}_{1-x}\text{Cr}_x\text{BO}_3$ : (a)  $x = 0.0$ , (b) 0.14 and (c) 1.0.

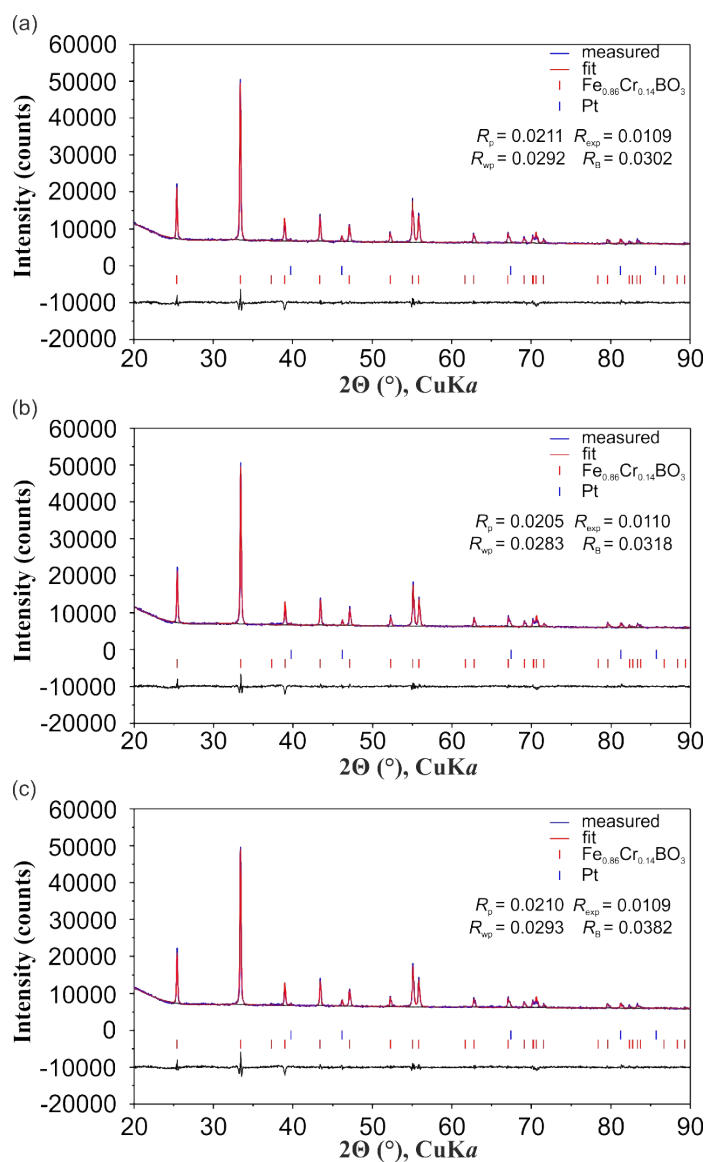

Fig. S5 X-ray diffraction patterns of  $\text{Fe}_{0.86}\text{Cr}_{0.14}\text{BO}_3$  collected at (a) 295, (b) 300 and (c) 305 K. The measured data is represented by a blue line, the refinement fit by a red line and the difference between the data and refinement fit by a black line. Peak positions of  $\text{Fe}_{0.86}\text{Cr}_{0.14}\text{BO}_3$  and Pt are shown by red and blue colour, respectively.

Table S10. Equations of approximation of temperature dependencies of unit cell parameters of  $\text{Fe}_{1-x}\text{Cr}_x\text{BO}_3$  ( $x = 0.0-1.0$ ).

| <b>FeBO<sub>3</sub></b>                                 |                                                                        |                                                                       |                                                         |
|---------------------------------------------------------|------------------------------------------------------------------------|-----------------------------------------------------------------------|---------------------------------------------------------|
| <b>T (K)</b>                                            | <b>Equation <math>l(t) = l_0 + l_1t + l_2t^2</math></b>                |                                                                       |                                                         |
|                                                         | <b><math>a(t)</math> (Å)</b>                                           | <b><math>c(t)</math> (Å)</b>                                          | <b><math>V(t)</math> (Å<sup>3</sup>)</b>                |
| <b>295–353</b>                                          | $4.6289(4) - 0.000077(25) \times t + 0.000000160(38) \times t^2$       | $14.525(20) - 0.00051(12) \times t + 0.00000110(19) \times t^2$       | $269.53(55) - 0.0183(34) \times t + 0.0000390(52)$      |
| <b>353–903</b>                                          | $4.61473(25) + 0.00001846(89) \times t + 0.00000000579(74) \times t^2$ | $14.4205(17) + 0.0001693(60) \times t + 0.0000000288(50) \times t^2$  | $265.955(35) + 0.00523(13) \times t + 0.00000126(11)$   |
| <b>Fe<sub>0.86</sub>Cr<sub>0.14</sub>BO<sub>3</sub></b> |                                                                        |                                                                       |                                                         |
| <b>295–305</b>                                          | $4.6255(53) - 0.000037(18) \times t$                                   | $14.473(15) - 0.000132(52) \times t$                                  | $268.16(70) - 0.0067(24) \times t$                      |
| <b>305–963</b>                                          | $4.61042(11) + 0.00001158(44) \times t + 0.00000000744(38) \times t^2$ | $14.38293(52) + 0.0001635(21) \times t + 0.0000000233(18) \times t^2$ | $264.767(18) + 0.004321(75) \times t + 0.000001330(64)$ |
| <b>CrBO<sub>3</sub></b>                                 |                                                                        |                                                                       |                                                         |
| <b>295–1173</b>                                         | $4.57006(17) + 0.00000336(60) \times t + 0.00000001051(50) \times t^2$ | $14.20693(65) + 0.0001066(23) \times t + 0.0000000396(20) \times t^2$ | $256.969(25) + 0.002287(91) \times t + 0.000001931(77)$ |
